# Supplementary material for: Association between Gut Microbiota and Biological Aging: A Two-Sample Mendelian Randomization Study
Source: MDPI journal article supplement (doi:10.3390/microorganisms12020370), 2024-02-11

### *Eubacterium (brachy group)*

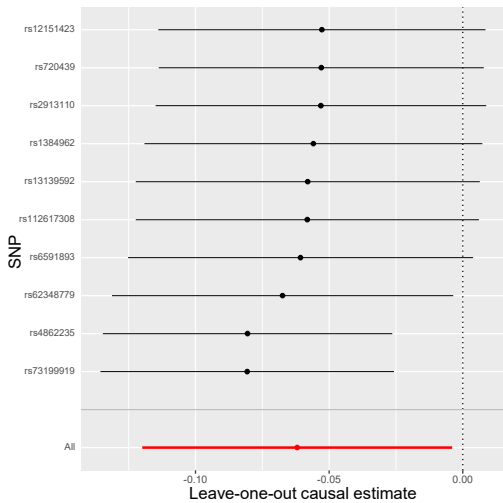

### *Eubacterium (rectale group)*

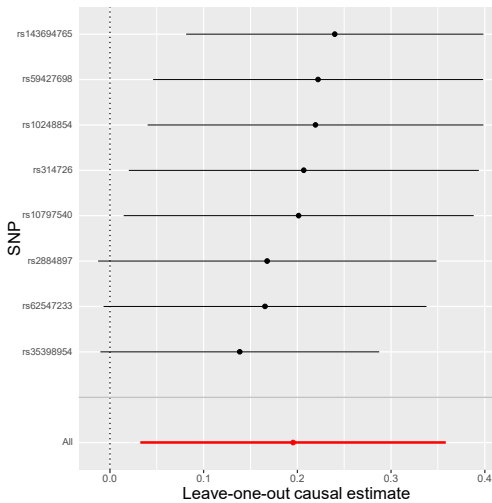

### *Adlercreutzia*

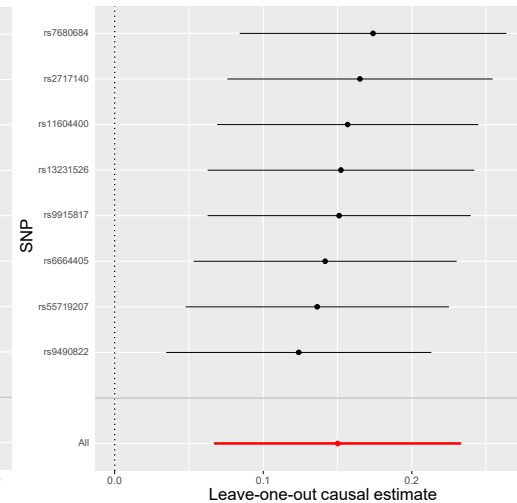

### *Bilophila*

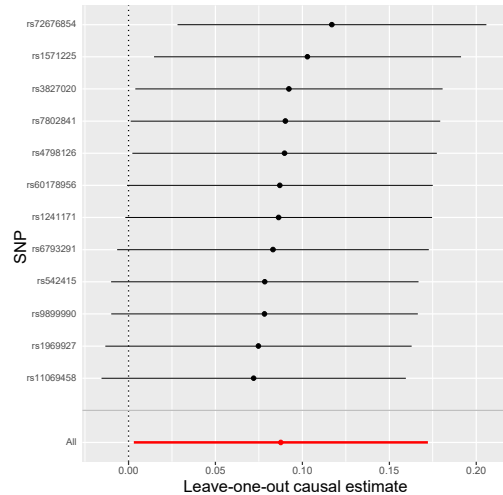

### *Lachnospira*

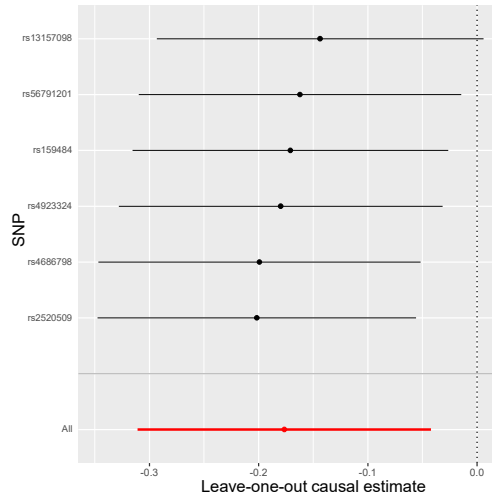

### *Sellimonas*

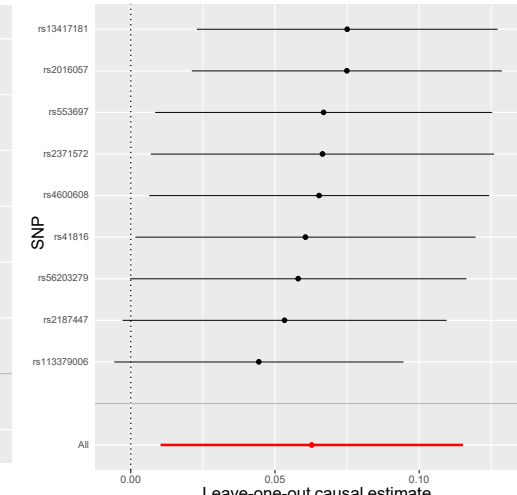

### *Streptococcus*

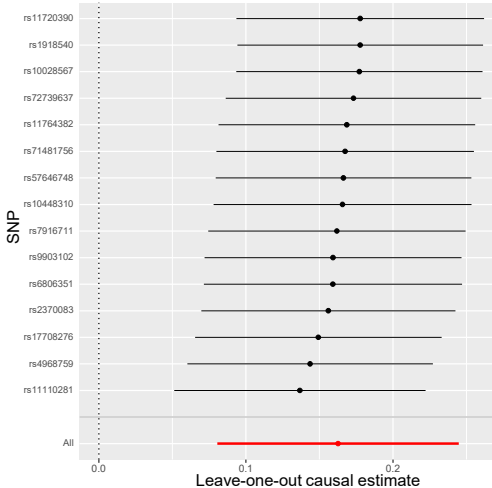

Supplement: s1 [file s1]
