# Supplementary figures and images for: Association between Gut Microbiota and Biological Aging: A Two-Sample Mendelian Randomization Study
Source: MDPI journal article supplement (doi:10.3390/microorganisms12020370), 2024-02-11

### *Actinomyces*

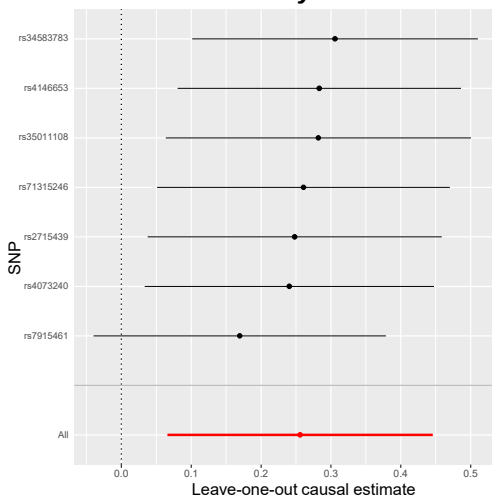

### *Butyrivimonas*

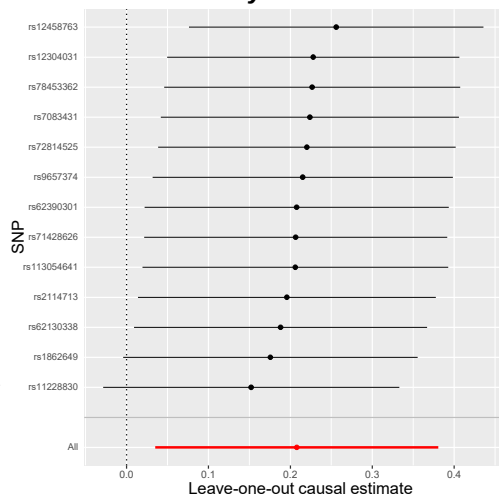

### *Lachnospiraceae (FCS020group)*

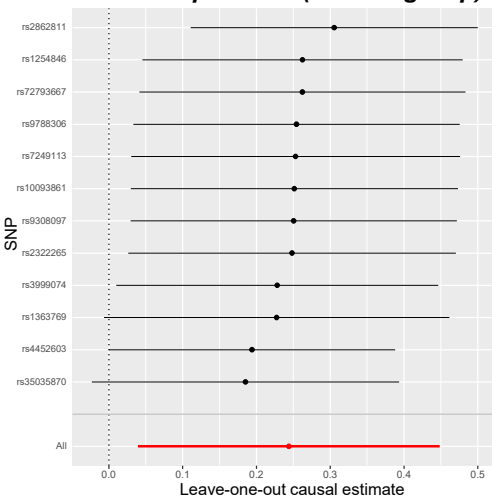

### *Roseburia*

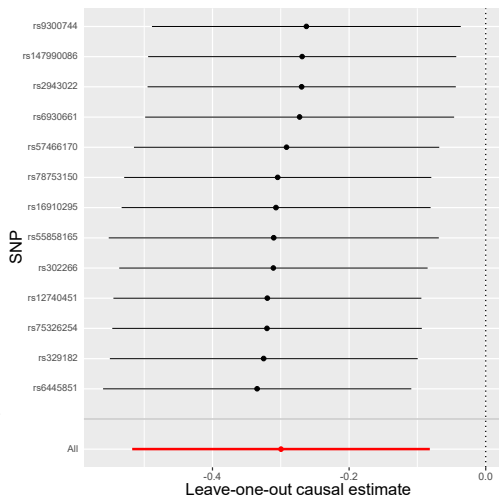

Supplement: s1 [file s1]
